# Supplementary material for: Single-micelle-templated synthesis of hollow silica nanospheres with tunable pore structures
Source: Royal Society of Chemistry journal article supplement (doi:10.1039/c5ra13492g), 2015-01-01
Supplement: c5ra13492g1.pdf [file c5ra13492g1.pdf]

**Single-micelle-templated Synthesis of Hollow  
Silica Nanospheres with Tunable Pore Structures**

Yingyu Li and Michal Kruk\*

Department of Chemistry, College of Staten Island, City University of New York, 2800 Victory  
Boulevard, Staten Island, New York 10314 and Graduate Center, City University of New York,  
365 Fifth Avenue, New York, New York 10016

**Supporting Table S1.** Summary of synthesis conditions for Pluronic-F108-templated silicas.<sup>a</sup>

| Sample | Initial synthesis temperature (°C) | Swelling agents (mL)       | Precursors    | Hydrothermal treatment temperature (°C) |
|--------|------------------------------------|----------------------------|---------------|-----------------------------------------|
| HSN01  | 14                                 |                            |               |                                         |
| HSN02  | 18                                 |                            |               |                                         |
| HSN03  | 20                                 |                            |               |                                         |
| HSN04  | 22                                 | toluene (3 mL)             | TEOS (1.5 mL) | 100                                     |
| HSN05  | 23                                 |                            |               |                                         |
| HSN06  | 25                                 |                            |               |                                         |
| HSN07  | r.t. (~25)                         |                            |               |                                         |
| HSN08  |                                    | N/A                        |               |                                         |
| HSN09  |                                    | TIPB (3.4 mL)              |               |                                         |
| HSN10  | 25                                 | cyclohexane (3.06 mL)      | TEOS (1.5 mL) | 100                                     |
| HSN11  |                                    | <i>m</i> -xylene (3.46 mL) |               |                                         |
| HSN12  |                                    | ethylbenzene (3.44 mL)     |               |                                         |
| HSN13  |                                    | toluene                    | TEOS (2.2 mL) |                                         |
| HSN14  | 25                                 | (3 mL)                     | TMOS (1.0 mL) | 100                                     |
| HSN15  |                                    |                            |               | r.t. (~25)                              |
| HSN16  |                                    |                            |               | 60                                      |
| HSN17  | 25                                 | toluene (3 mL)             | TEOS (1.5 mL) | 80                                      |
| HSN18  |                                    |                            |               | 120                                     |
| HSN19  |                                    |                            |               | 130                                     |

<sup>a</sup> Taken in part from Li, Y. *Ph.D. Dissertation*, City University of New York, 2014.

**Supporting Table S2.** Structural parameters for calcined silicas synthesized at different initial temperatures.<sup>a,b</sup>

| Sample | Initial synthesis temperature (°C) | w <sub>KJS</sub> (nm) | S <sub>BET</sub> (m <sup>2</sup> /g) | V <sub>t</sub> (cm <sup>3</sup> /g) |
|--------|------------------------------------|-----------------------|--------------------------------------|-------------------------------------|
| HSN01  | 14                                 | 44                    | 838                                  | 1.23                                |
| HSN02  | 18                                 | 37                    | 744                                  | 1.57                                |
| HSN03  | 20                                 | 30                    | 681                                  | 1.44                                |
| HSN04  | 22                                 | 28.3                  | 789                                  | 1.95                                |
| HSN05  | 23                                 | 22.7                  | 771                                  | 1.81                                |
| HSN06  | 25                                 | 16                    | 761                                  | 1.65                                |
| HSN07  | r.t. (~25) <sup>c</sup>            | 16.1                  | 807                                  | 1.75                                |

<sup>a</sup> Notation: w<sub>KJS</sub>, pore diameter calculated using BJH-KJS method; S<sub>BET</sub>, BET specific surface area; V<sub>t</sub>: total pore volume. <sup>b</sup> Li, Y. *Ph.D. Dissertation*, City University of New York, 2014. <sup>c</sup> Synthesized at room temperature without temperature control.

**Supporting Table S3.** Structural parameters for calcined silica samples synthesized at different initial synthesis temperatures by using either Pluronic F108/ethylbenzene or F108/*m*-xylene pair as the template.<sup>a,b</sup>

| Template               | Initial synthesis temperature (°C) | $w_{KJS}$ (nm) | $S_{BET}$ (m <sup>2</sup> /g) | $V_t$ (cm <sup>3</sup> /g) |
|------------------------|------------------------------------|----------------|-------------------------------|----------------------------|
| F108/ethylbenzene      | 14                                 | 27.9           | 942                           | 0.64                       |
|                        | 18                                 | 31.0           | 875                           | 0.94                       |
|                        | 22                                 | 30.7           | 805                           | 1.37                       |
|                        | 25                                 | 25.6           | 713                           | 1.65                       |
| F108/ <i>m</i> -xylene | 14                                 | 27.7           | 823                           | 0.55                       |
|                        | 18                                 | 30.7           | 652                           | 0.68                       |
|                        | 20                                 | 30.8           | 729                           | 1.06                       |
|                        | 22                                 | 27.3           | 688                           | 1.38                       |
|                        | 25                                 | 21.6           | 710                           | 1.58                       |

Notation<sup>a</sup>:  $w_{KJS}$ , pore diameter calculated by using BJH-KJS method for cylindrical mesopores;  $S_{BET}$ , BET specific surface area;  $V_t$ : total pore volume. <sup>b</sup> Data for samples prepared at 25 °C and from Li, Y. *Ph.D. Dissertation*, City University of New York, 2014.

**Supporting Table S4.** Structural parameters of calcined silicas synthesized at 25 °C using different swelling agents.<sup>a,b</sup>

| Sample | swelling agent   | $w_{\text{KJS}}$ (nm) | $S_{\text{BET}}$ (m <sup>2</sup> /g) | $V_{\text{t}}$ (cm <sup>3</sup> /g) |
|--------|------------------|-----------------------|--------------------------------------|-------------------------------------|
| HSN08  | N/A              | N/A                   | 730                                  | 0.36                                |
| HSN09  | TIPB             | 13.1                  | 840                                  | 0.58                                |
| HSN10  | Cyclohexane      | 15.6                  | 884                                  | 0.58                                |
| HSN06  | Toluene          | 16.0                  | 761                                  | 1.65                                |
| HSN11  | <i>m</i> -Xylene | 21.6                  | 710                                  | 1.58                                |
| HSN12  | Ethylbenzene     | 25.6                  | 713                                  | 1.65                                |

<sup>a</sup> Notation:  $w_{\text{KJS}}$ , pore diameter calculated by using BJH-KJS method;  $S_{\text{BET}}$ , BET specific surface area;  $V_{\text{t}}$ : total pore volume. <sup>b</sup> Li, Y. *Ph.D. Dissertation*, City University of New York, 2014.

**Supporting Table S5.** Structural parameters for calcined silica samples synthesized with different amount or kind of precursor.<sup>a</sup>

| Sample | Silica Precursor (mL) | $w_{\text{KJS}}$ (nm) | $S_{\text{BET}}$ (m <sup>2</sup> /g) | $V_{\text{t}}$ (cm <sup>3</sup> /g) |
|--------|-----------------------|-----------------------|--------------------------------------|-------------------------------------|
| HSN06  | TEOS (1.5)            | 16.0                  | 761                                  | 1.65                                |
| HSN13  | TEOS (2.2)            | 17.8                  | 707                                  | 1.68                                |
| HSN14  | TMOS (1.0)            | 20.7                  | 757                                  | 1.67                                |

<sup>a</sup> Notation:  $w_{\text{KJS}}$ , pore diameter calculated by using BJH-KJS method;  $S_{\text{BET}}$ , BET specific surface area;  $V_{\text{t}}$ : total pore volume. Adapted from Li, Y. *Ph.D. Dissertation*, City University of New York, 2014.

**Supporting Table S6.** Structural parameters for calcined silicas synthesized at different hydrothermal treatment temperatures.<sup>a,b</sup>

| Sample | Hydrothermal treatment temperature (°C) | $w_{KJS}$ (nm) | $S_{BET}$ (m <sup>2</sup> /g) | $V_t$ (cm <sup>3</sup> /g) |
|--------|-----------------------------------------|----------------|-------------------------------|----------------------------|
| HSN15  | room temperature (~25)                  | 9.5            | 481                           | 0.43                       |
| HSN16  | 60                                      | 10.7           | 655                           | 0.60                       |
| HSN17  | 80                                      | 13.1           | 775                           | 0.77                       |
| HSN06  | 100                                     | 16.0           | 761                           | 1.65                       |
| HSN18  | 120                                     | 16.7           | 658                           | 1.87                       |
| HSN19  | 130                                     | 23.2           | 585                           | 2.19                       |

<sup>a</sup> Notation:  $w_{KJS}$ , pore diameter calculated by using BJH-KJS method;  $S_{BET}$ , BET specific surface area;  $V_t$ : total pore volume. <sup>b</sup> Adapted in part from Li, Y. *Ph.D. Dissertation*, City University of New York, 2014.

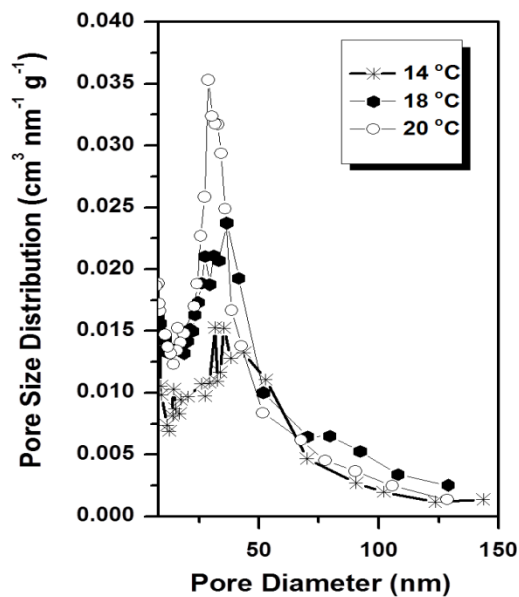

**Supporting Figure S1.** The pore size distribution of the samples of calcined hollow silica nanospheres synthesized with Pluronic F108/toluene pair at 14, 18 and 20 °C.

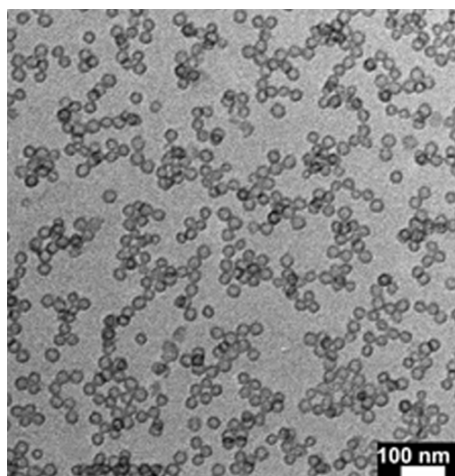

**Supporting Figure S2.** Transmission electron microscopy image of hollow silica nanospheres synthesized at 25 °C for ethanol extracted HSN13.

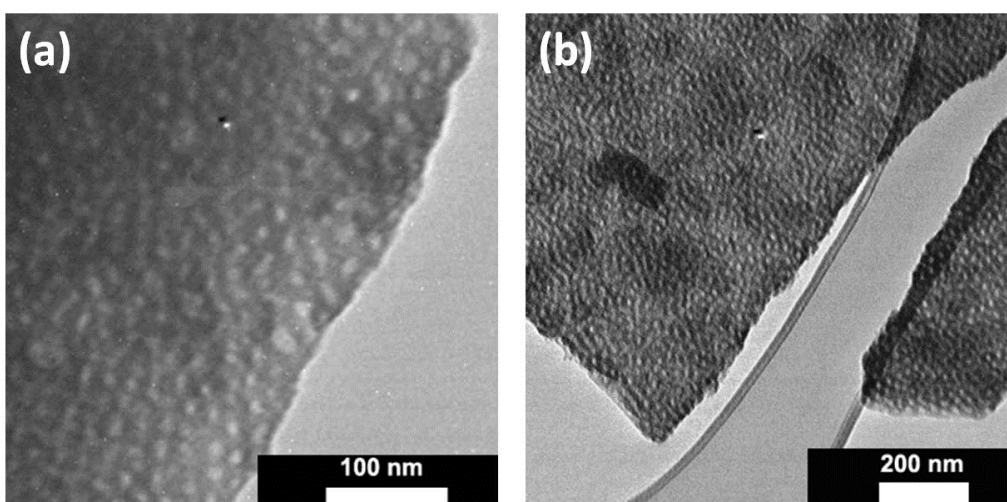

**Supporting Figure S3.** TEM images of silica samples synthesized at 25 °C with (a) TIPB and (b) cyclohexane swelling agents (samples were hydrothermally treated at 100 °C). Li, Y. *Ph.D.*

*Dissertation*, City University of New York, 2014.

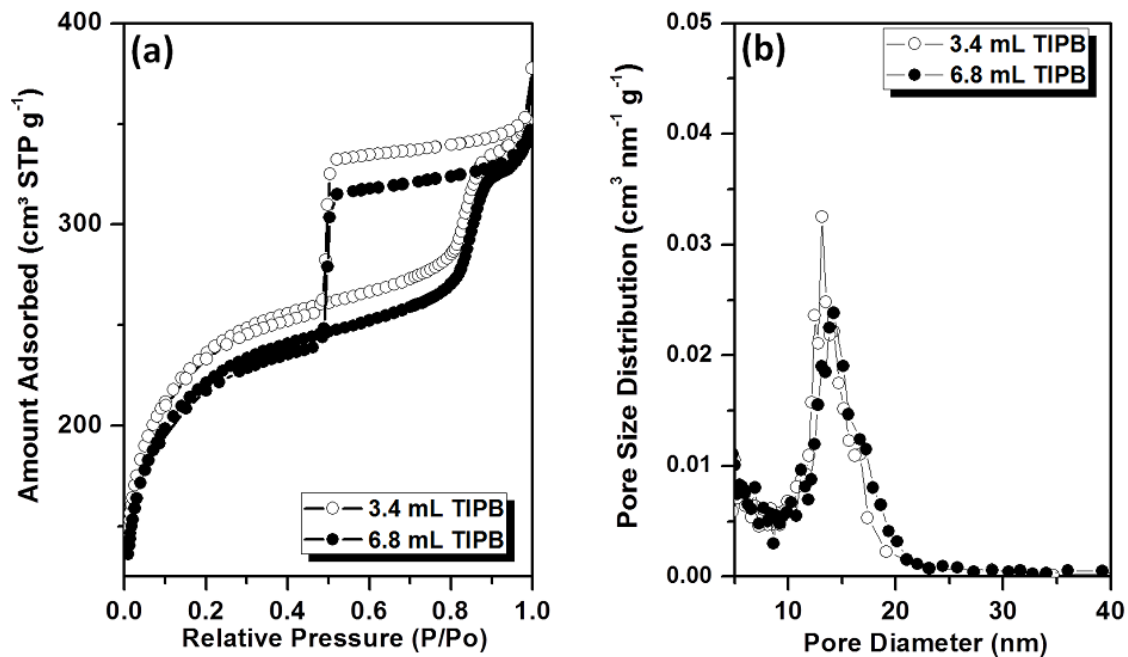

**Supporting Figure S4.** Nitrogen adsorption isotherms (a) and pore size distributions (b) for calcined silicas synthesized at the initial temperature of 25 °C with different amounts TIPB.

Adapted in part from Li, Y. *Ph.D. Dissertation*, City University of New York, 2014.



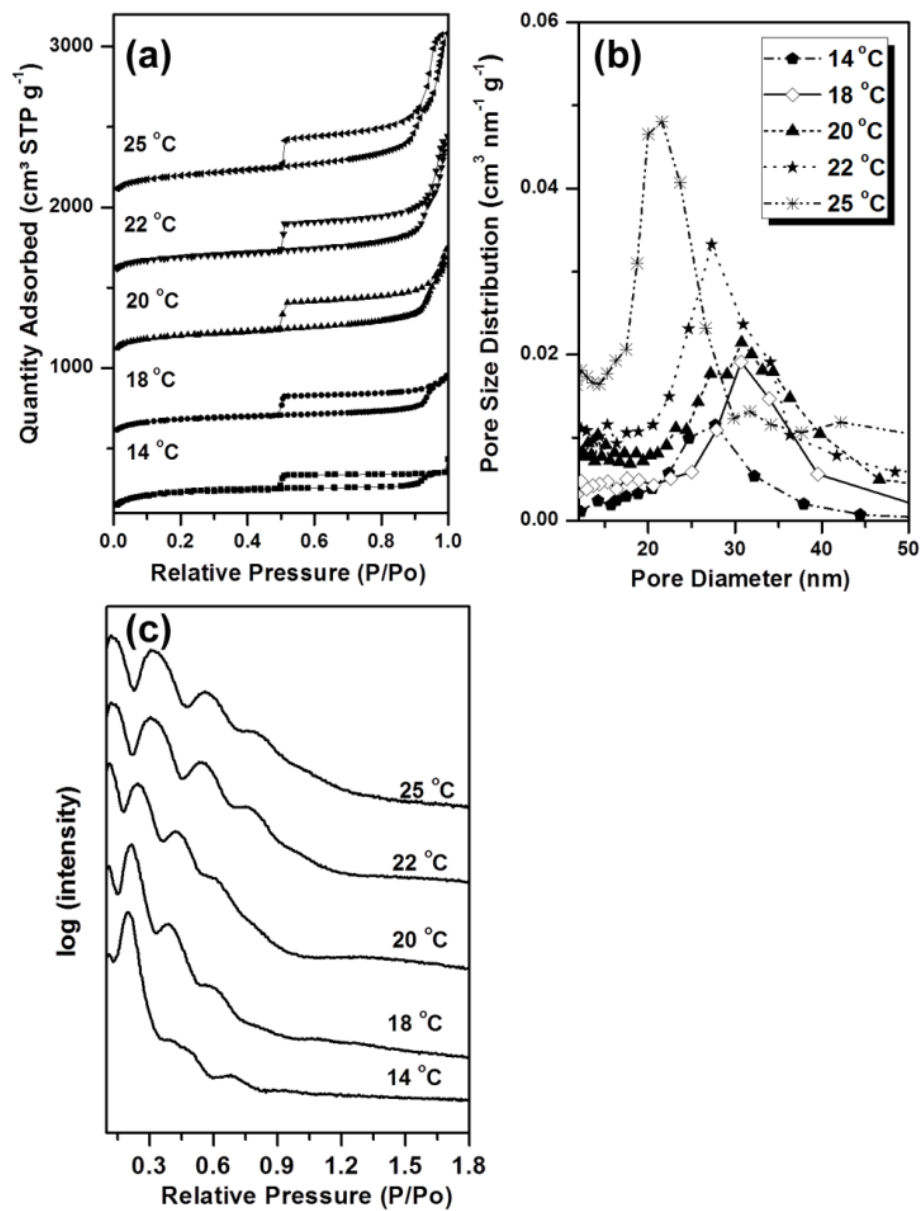

**Supporting Figure S5.** (a) Nitrogen adsorption isotherms, (b) pore size distributions and (c) SAXS patterns for calcined silicas initially synthesized at different temperatures using F108/*m*-xylene pair. Li, Y. *Ph.D. Dissertation*, City University of New York, 2014.

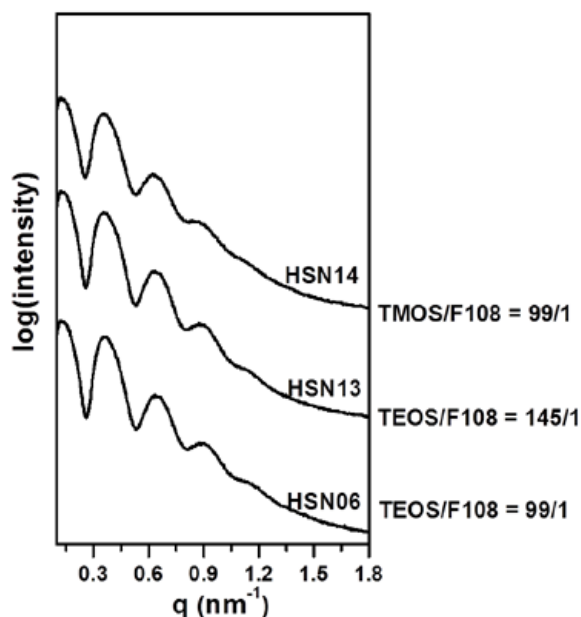

**Supporting Figure S6.** SAXS patterns of HSNs samples prepared with different silica precursors using F108/toluene pair as the template, with hydrothermal treatment at 100 °C. Adapted from Li, Y. *Ph.D. Dissertation*, City University of New York, 2014.

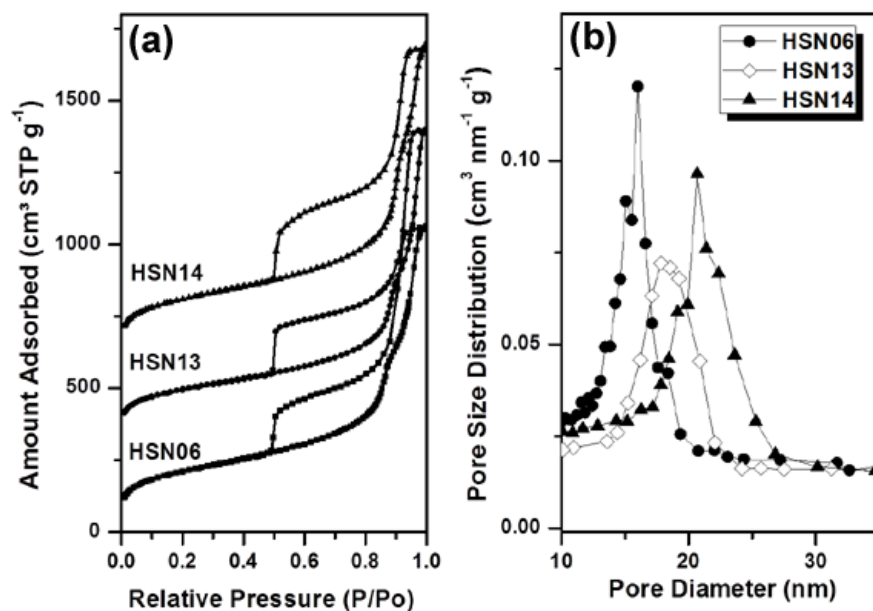

**Supporting Figure S7.** (a) Nitrogen adsorption isotherms and (b) pore size distributions for calcined silicas synthesized with different amount or kind of the framework precursor using toluene at 25 °C. Adapted from Li, Y. *Ph.D. Dissertation*, City University of New York, 2014.

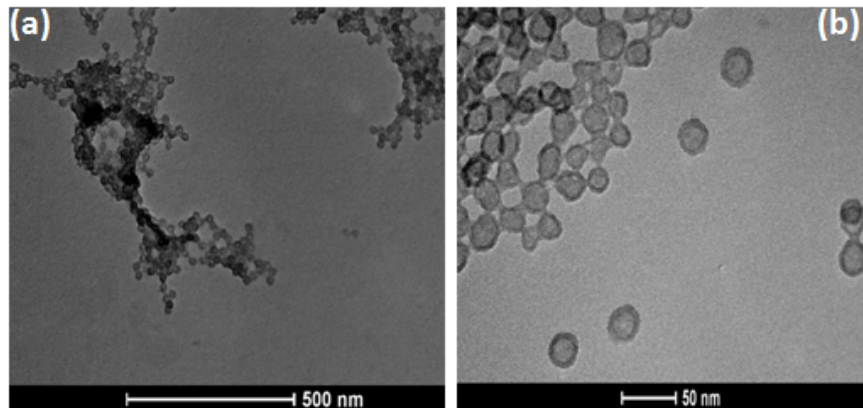

**Supporting Figure S8.** TEM images of the as-synthesized samples of (a) HSN15 that was not hydrothermally treated, and (b) HSN17 that was hydrothermally treated at 80 °C. Taken from Li, Y. *Ph.D. Dissertation*, City University of New York, 2014.

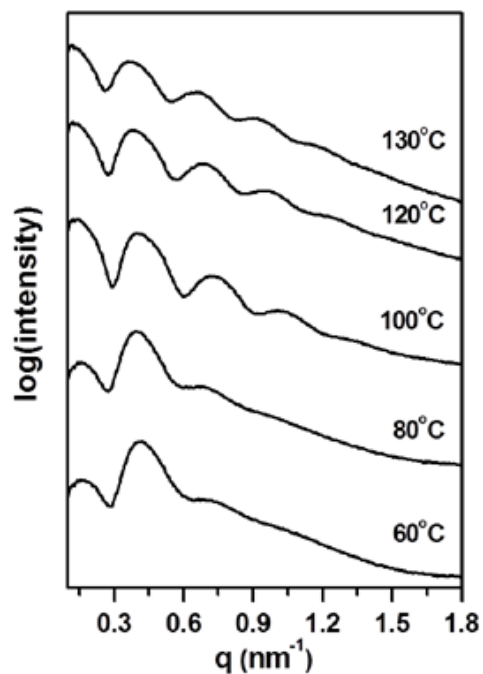

**Supporting Figure S9.** XRD patterns of samples prepared at an initial synthesis temperature of 25 °C using Pluronic F108/toluene pair as the template, but with aging at different temperatures. Adapted in part from Li, Y. *Ph.D. Dissertation*, City University of New York, 2014.
